# Supplementary material for: Water Footprint Assessment of Rainfed Crops with Critical Irrigation under Different Climate Change Scenarios in SAT Regions
Source: MDPI journal article supplement (doi:10.3390/w14081206), 2022-04-08
Supplement: s1 [file s1]

Archive with 1 entries (1 files):
- water-1643615-supplementary.pdf
