# Supplementary figures and images for: Water Footprint Assessment of Rainfed Crops with Critical Irrigation under Different Climate Change Scenarios in SAT Regions
Source: MDPI journal article supplement (doi:10.3390/w14081206), 2022-04-08

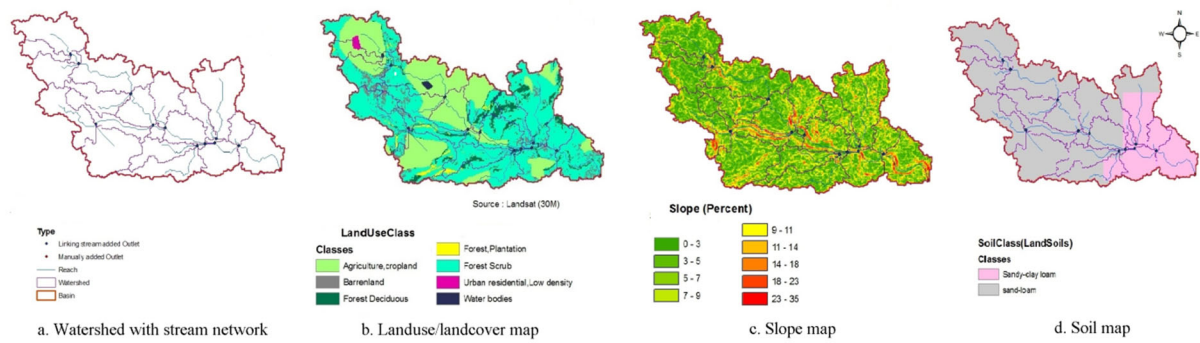

Figure S1: Input layers to SWAT model

Supplement: s1 [file s1 › water-1643615-supplementary.pdf]
